# Supplementary material
Source: PubMed Central journal article supplement (PMC4567551)
Supplement: NIHMS666159-supplement-1.pdf [file NIHMS666159-supplement-1.pdf]

## **1. INVENTORY OF SUPPLEMENTAL ITEMS:**

- Supplemental Figures and their relation to main figures:
  - Figure 1 (Fig. S1)
  - Figure 2 (Fig. S2 and S3)
  - Figure 3 (Fig. S4)
- Supplement Figure Legends
- Supplemental Table
- Supplemental Table Legend
- Extended Experimental Procedures
